# Supplementary material for: Deep Learning-Based Method for Compound Identification in NMR Spectra of Mixtures
Source: MDPI journal article supplement (doi:10.3390/molecules27123653), 2022-06-07
Supplement: s1 [file s1]

# Deep Learning-Based Method for Compound Identification in NMR Spectra of Mixtures

Weiwei Wei <sup>1,†</sup>, Yuxuan Liao <sup>2,†</sup>, Yufei Wang <sup>2</sup>, Shaoqi Wang <sup>2</sup>, Wen Du <sup>1</sup>, Hongmei Lu <sup>2</sup>, Bo Kong <sup>1,\*</sup>, Huawu Yang <sup>3,\*</sup> and Zhimin Zhang <sup>2,\*</sup>

<sup>1</sup> Technology Center, China Tobacco Hunan Industrial Co., Ltd., Changsha 410014, China; weiww0216@hngytobacco.com (W.W.); duwen0621@hngytobacco.com (W.D.)

<sup>2</sup> College of Chemistry and Chemical Engineering, Central South University, Changsha 410083, China; 212311021@csu.edu.cn (Y.L.); wyf991314@163.com (Y.W.); 8202180822@csu.edu.cn (S.W.); hongmeilu@csu.edu.cn (H.L.)

<sup>3</sup> Flavors and Fragrances Research Institute, Technology Center, China Tobacco Hunan Industrial Co., Ltd., Changsha 410014, China

\* Correspondence: kongb0706@hngytobacco.com (B.K.); yanghw0918@hngytobacco.com (H.Y.); zmzhang@csu.edu.cn (Z.Z.)

† These authors contributed equally to this work.

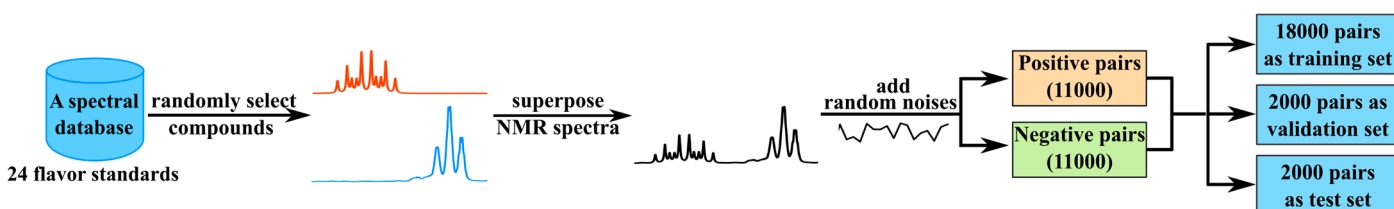

**Figure S1.** Data augmentation and samples split. A total of 22000 augmented NMR spectral pairs were generated and split to train, validation and test the pSCNN model, and it was obtained by superposing several NMR spectra sampled from a spectral database and the random noises.

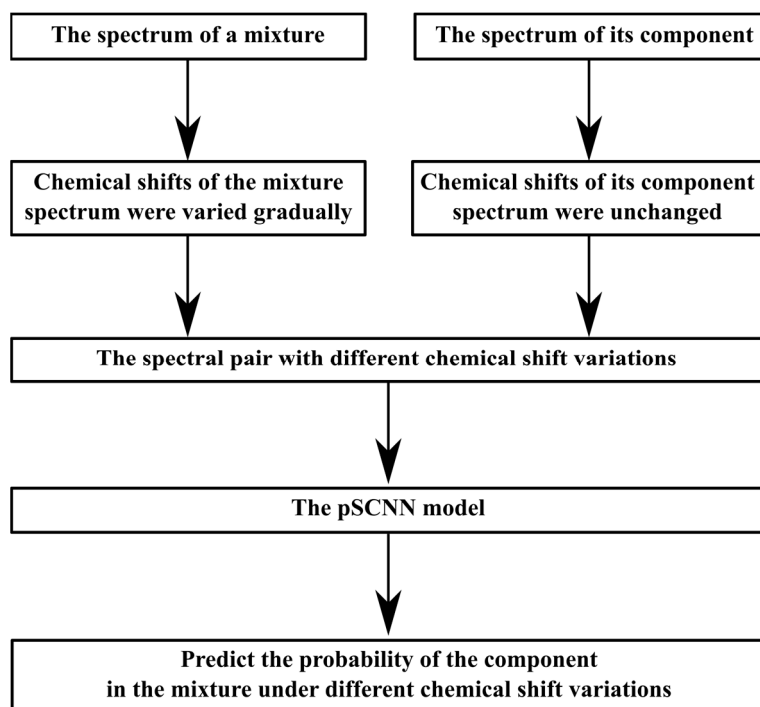

**Figure S2.** Flowchart of the overall scheme for verifying the translation invariance.

**Table S1.** The information of 24 flavor standards.

| CAS        | Name                       | SMILES                                       |
|------------|----------------------------|----------------------------------------------|
| 57-55-6    | 1,2-Propanediol            | <chem>CC(O)CO</chem>                         |
| 470-82-6   | 1,8-Cineole                | <chem>C[C@]12CC[C@H](CC1)C(C)(C)O2</chem>    |
| 116-53-0   | 2-Methylbutyric acid       | <chem>CCC(C)C(O)=O</chem>                    |
| 620-02-0   | 5-Methylfurfural           | <chem>[H]C(=O)c1ccc(C)o1</chem>              |
| 140-11-4   | Benzyl acetate             | <chem>CC(=O)OCc1ccccc1</chem>                |
| 488-10-8   | cis-Jasmone                | <chem>[H]\C(CC)=C/[H])CC1=C(C)CCC1=O</chem>  |
| 5392-40-5  | Citral                     | <chem>[H]C(=O)C=C(C)CC\C=C(\C)C</chem>       |
| 106-23-0   | Citronellal                | <chem>CC(CC\C=C(\C)C)CC=O</chem>             |
| 97-53-0    | Eugenol                    | <chem>COc1cc(CC=C)ccc1O</chem>               |
| 98-00-0    | Furfuryl alcohol           | <chem>OCc1ccco1</chem>                       |
| 106-24-1   | Geraniol                   | <chem>C\C(C)=C\CC\C(C)=C\CO</chem>           |
| 123-92-2   | Isopentyl acetate          | <chem>CC(C)CCOC(C)=O</chem>                  |
| 503-74-2   | Isovaleric acid            | <chem>CC(C)CC(O)=O</chem>                    |
| 50-21-5    | Lactic acid                | <chem>CC(O)C(O)=O</chem>                     |
| 3681-71-8  | Leaf acetate               | <chem>[H]\C(CC)=C/[H])CCOC(C)=O</chem>       |
| 928-96-1   | Leaf alcohol               | <chem>CC\C=C/CCO</chem>                      |
| 115-95-7   | Linalyl acetate            | <chem>C\C(C)=C\CCC(C)(OC(C)=O)C=C</chem>     |
| 14073-97-3 | L-Menthone                 | <chem>CC(C)[C@@H]1CC[C@H](C)CC1=O</chem>     |
| 93-15-2    | Methyl eugenol             | <chem>COc1ccc(CC=C)cc1OC</chem>              |
| 7212-44-4  | Nerolidol                  | <chem>C\C(C)=C/CC\C(C)=C\CCC(C)(O)C=C</chem> |
| 110-93-0   | Sulcatone                  | <chem>C\C(C)=C\CCC(C)=O</chem>               |
| 14901-07-6 | $\beta$ -Ionone            | <chem>CC(=O)\C=C\C1=C(C)CCCC1(C)C</chem>     |
| 706-14-9   | $\gamma$ -Decalactone      | <chem>CCCCCCC1CCC(=O)O1</chem>               |
| 104-61-0   | $\gamma$ -Nonanoic lactone | <chem>CCCCC1CCC(=O)O1</chem>                 |

**Table S2.** The information of the flavor mixtures.

| Flavor mixture | Formulation          | Ratio |
|----------------|----------------------|-------|
| F1             | Linalyl acetate      | 0.50  |
|                | $\beta$ -Ionone      | 0.50  |
| F2             | 1,2-Propanediol      | 0.50  |
|                | $\beta$ -Ionone      | 0.50  |
| F3             | Nerolidol            | 0.50  |
|                | Leaf acetate         | 0.50  |
| F4             | $\beta$ -Ionone      | 0.33  |
|                | Furfuryl alcohol     | 0.33  |
|                | Methyl eugenol       | 0.33  |
| F5             | 1,8-Cineole          | 0.33  |
|                | cis-Jasmone          | 0.33  |
|                | 5-Methylfurfural     | 0.33  |
| F6             | 1,8-Cineole          | 0.33  |
|                | Leaf acetate         | 0.33  |
|                | Citral               | 0.33  |
| F7             | cis-Jasmone          | 0.33  |
|                | Linalyl acetate      | 0.33  |
|                | Eugenol              | 0.33  |
| F8             | Linalyl acetate      | 0.33  |
|                | Geraniol             | 0.33  |
|                | Eugenol              | 0.33  |
| F9             | Linalyl acetate      | 0.25  |
|                | Citral               | 0.25  |
|                | Leaf alcohol         | 0.25  |
|                | 2-Methylbutyric acid | 0.25  |
| F10            | Sulcatone            | 0.25  |
|                | L-Menthone           | 0.25  |
|                | Citronellal          | 0.25  |
|                | Leaf acetate         | 0.25  |
| F11            | $\beta$ -Ionone      | 0.25  |
|                | Linalyl acetate      | 0.25  |
|                | 1,8-Cineole          | 0.25  |
|                | Eugenol              | 0.25  |

Table S2. Cont.

| Flavor mixture | Formulation           | Ratio |
|----------------|-----------------------|-------|
| F12            | Linalyl acetate       | 0.25  |
|                | Leaf acetate          | 0.25  |
|                | Nerolidol             | 0.25  |
|                | L-Menthone            | 0.25  |
| F13            | Linalyl acetate       | 0.20  |
|                | Leaf alcohol          | 0.20  |
|                | $\gamma$ -Decalactone | 0.20  |
|                | Isovaleric acid       | 0.20  |
|                | Methyl eugenol        | 0.20  |
| F14            | cis-Jasmone           | 0.20  |
|                | Sulcatone             | 0.20  |
|                | Citral                | 0.20  |
|                | Benzyl acetate        | 0.20  |
|                | Citronellal           | 0.20  |
| F15            | Leaf acetate          | 0.20  |
|                | cis-Jasmone           | 0.20  |
|                | Benzyl acetate        | 0.20  |
|                | Citral                | 0.20  |
|                | Nerolidol             | 0.20  |

**Table S3.** The information of the additional flavor mixture.

| Additional flavor mixture | Formulation*               | Ratio |
|---------------------------|----------------------------|-------|
| U1                        | $\beta$ -Ionone            | 0.20  |
|                           | 2-Methylbutyric acid       | 0.20  |
|                           | $\gamma$ -Nonanoic lactone | 0.20  |
|                           | Citral                     | 0.20  |
|                           | Leaf alcohol               | 0.20  |

\* This information was not known at the time of our analysis with the model, and that we were informed of the corresponding components after submitting the result.

**Table S4.** The detailed results of all mixtures in the flavor mixtures dataset.

| No. | Components                                                        | Prediction results                                                                   | ACC(%) | TPR(%) | FPR(%) |
|-----|-------------------------------------------------------------------|--------------------------------------------------------------------------------------|--------|--------|--------|
| F1  | Linalyl acetate<br>$\beta$ -Ionone                                | Linalyl acetate<br>$\beta$ -Ionone                                                   | 100.0  | 100.0  | 0.0    |
| F2  | 1,2-Propanediol<br>$\beta$ -Ionone                                | 1,2-Propanediol<br>$\beta$ -Ionone<br>2-Methylbutyric acid                           | 95.83  | 100.0  | 4.55   |
| F3  | Nerolidol<br>Leaf acetate                                         | Nerolidol<br>Leaf acetate                                                            | 100.0  | 100.0  | 0.0    |
| F4  | $\beta$ -Ionone<br>Furfuryl alcohol<br>Methyl eugenol             | $\beta$ -Ionone<br>Furfuryl alcohol<br>Methyl eugenol                                | 100.0  | 100.0  | 0.0    |
| F5  | 1,8-Cineole<br>cis-Jasmone<br>5-Methylfurfural                    | 1,8-Cineole<br>cis-Jasmone                                                           | 95.83  | 66.67  | 0.0    |
| F6  | 1,8-Cineole<br>Leaf acetate<br>Citral                             | 1,8-Cineole<br>Leaf acetate<br>Citral                                                | 100.0  | 100.0  | 0.0    |
| F7  | cis-Jasmone<br>Linalyl acetate<br>Eugenol                         | cis-Jasmone<br>Sulcatone<br>Eugenol<br>Linalyl acetate                               | 95.83  | 100.0  | 4.76   |
| F8  | Linalyl acetate<br>Geraniol<br>Eugenol                            | Linalyl acetate<br>Methyl eugenol<br>Eugenol<br>Geraniol                             | 95.83  | 100.0  | 4.76   |
| F9  | Linalyl acetate<br>Citral<br>Leaf alcohol<br>2-Methylbutyric acid | Linalyl acetate<br>Citral<br>Leaf alcohol<br>Isovaleric acid<br>2-Methylbutyric acid | 91.67  | 100.0  | 5.0    |
| F10 | Sulcatone<br>L-Menthone<br>Citronellal<br>Leaf acetate            | Sulcatone<br>L-Menthone<br>Citronellal<br>Leaf acetate                               | 100.0  | 100.0  | 0.0    |

Table S4. Cont.

| No. | Components                                                                                    | Prediction results                                                                                                          | ACC(%) | TPR(%) | FPR(%) |
|-----|-----------------------------------------------------------------------------------------------|-----------------------------------------------------------------------------------------------------------------------------|--------|--------|--------|
| F11 | $\beta$ -Ionone<br>Linalyl acetate<br>1,8-Cineole<br>Eugenol                                  | $\beta$ -Ionone<br>Linalyl acetate<br>1,8-Cineole<br>Eugenol<br>Methyl eugenol                                              | 95.83  | 100.0  | 5.0    |
| F12 | Linalyl acetate<br>Leaf acetate<br>Nerolidol<br>L-Menthone                                    | Linalyl acetate<br>Leaf acetate<br>Nerolidol<br>Isovaleric acid<br>L-Menthone                                               | 95.83  | 100.0  | 5.0    |
| F13 | Linalyl acetate<br>Leaf alcohol<br>$\gamma$ -Decalactone<br>Isovaleric acid<br>Methyl eugenol | Linalyl acetate<br>Leaf alcohol<br>$\gamma$ -Decalactone<br>$\gamma$ -Nonanoic lactone<br>Methyl eugenol<br>Isovaleric acid | 95.83  | 100.0  | 5.26   |
| F14 | cis-Jasmone<br>Sulcatone<br>Citral<br>Benzyl acetate<br>Citronellal                           | cis-Jasmone<br>Sulcatone<br>Citral<br>Benzyl acetate<br>Citronellal                                                         | 100.0  | 100.0  | 0.0    |
| F15 | Leaf acetate<br>cis-Jasmone<br>Benzyl acetate<br>Citral<br>Nerolidol                          | Leaf acetate<br>cis-Jasmone<br>Benzyl acetate<br>Citral<br>Sulcatone                                                        | 95.83  | 80.0   | 0.0    |

**Table S5.** The detailed results of the mixture in the additional flavor mixture dataset.

| No. | Components                                                                                      | Prediction results                                                                                                                          | ACC(%) | TPR(%) | FPR(%) |
|-----|-------------------------------------------------------------------------------------------------|---------------------------------------------------------------------------------------------------------------------------------------------|--------|--------|--------|
| U1  | $\beta$ -Ionone<br>2-Methylbutyric acid<br>$\gamma$ -Nonanoic lactone<br>Citral<br>Leaf alcohol | $\beta$ -Ionone<br>$\gamma$ -Decalactone<br>$\gamma$ -Nonanoic lactone<br>Citral<br>Leaf alcohol<br>Isovaleric acid<br>2-Methylbutyric acid | 91.67  | 100.00 | 10.53  |



**Table S6.** The information of the augmented mixtures.

| Augmented mixture | Formulation                | Ratio |
|-------------------|----------------------------|-------|
| A1                | cis-Jasmone                | 0.50  |
|                   | Leaf alcohol               | 0.50  |
| A2                | 1,2-Propanediol            | 0.50  |
|                   | $\beta$ -Ionone            | 0.50  |
| A3                | Citral                     | 0.33  |
|                   | Citronellal                | 0.33  |
|                   | Methyl eugenol             | 0.33  |
| A4                | L-Menthone                 | 0.33  |
|                   | Eugenol                    | 0.33  |
|                   | Nerolidol                  | 0.33  |
| A5                | cis-Jasmone                | 0.25  |
|                   | Citral                     | 0.25  |
|                   | $\beta$ -Ionone            | 0.25  |
|                   | Nerolidol                  | 0.25  |
| A6                | Sulcatone                  | 0.25  |
|                   | L-Menthone                 | 0.25  |
|                   | Citronellal                | 0.25  |
|                   | Leaf acetate               | 0.25  |
| A7                | $\gamma$ -Decalactone      | 0.20  |
|                   | Leaf alcohol               | 0.20  |
|                   | Methyl eugenol             | 0.20  |
|                   | $\beta$ -Ionone            | 0.20  |
|                   | Isopentyl acetate          | 0.20  |
| A8                | $\beta$ -Ionone            | 0.20  |
|                   | 2-Methylbutyric acid       | 0.20  |
|                   | $\gamma$ -Nonanoic lactone | 0.20  |
|                   | Citral                     | 0.20  |
|                   | Leaf alcohol               | 0.20  |
